# Supplementary material for: Generative Artificial Intelligence in Medicine: A Mixed Methods Survey of UK General Practitioners
Source: Research Square preprint supplement (doi:10.21203/rs.3.rs-5454088/v1), 2024-12-25
Supplement: Supplementary file 1 [file 4c32f0064411a65a806bb05a.docx]

**Appendix 1.** Survey

S1 - Role

Which of the following best describes your role?

- GP Partner / Principal (1)
- Salaried GP (2)
- Locum GP (3)
- GP Registrar (4)
- Secondary Care doctor (5)
- Other (6)

S2 - Country/region

Where are you currently practising?

- London (1)
- South West (2)
- South East (3)
- West Midlands (4)
- East Midlands (5)
- East of England (6)
- Yorkshire and Humber (7)
- North East (8)
- North West (9)
- Scotland (10)
- Wales (11)
- Northern Ireland (12)
- Not currently working (13)
- Working outside the UK (14)

D1 - Gender

Are you...

- Male (1)
- Female (2)
- Other (3)
- Prefer not to say (4)

D2 - Age

Are you...

- 35 or under (1)
- 36 to 45 (2)
- 46 to 55 (3)
- 56 or over (4)

D4 - Practice Size

How many patients do you have on your practice list?

- Up to 5,000 patients (1)
- 5,001-7,500 patients (2)
- 7,501-10,000 patients (3)
- 10,001-12,500 patients (4)
- 12,501 patients or more (5)

D5 - Year of qualification

When did you qualify as a doctor?

- 1960 (1960)
- 1961 (1961)
- 1962 (1962)
- 1963 (1963)
- 1964 (1964)
- 1965 (1965)
- 1966 (1966)
- 1967 (1967)
- 1968 (1968)
- 1969 (1969)
- 1970 (1970)
- 1971 (1971)
- 1972 (1972)
- 1973 (1973)
- 1974 (1974)
- 1975 (1975)
- 1976 (1976)
- 1977 (1977)
- 1978 (1978)
- 1979 (1979)
- 1980 (1980)
- 1981 (1981)
- 1982 (1982)
- 1983 (1983)
- 1984 (1984)
- 1985 (1985)
- 1986 (1986)
- 1987 (1987)
- 1988 (1988)
- 1989 (1989)
- 1990 (1990)
- 1991 (1991)
- 1992 (1992)
- 1993 (1993)
- 1994 (1994)
- 1995 (1995)
- 1996 (1996)
- 1997 (1997)
- 1998 (1998)
- 1999 (1999)
- 2000 (2000)
- 2001 (2001)
- 2002 (2002)
- 2003 (2003)
- 2004 (2004)
- 2005 (2005)
- 2006 (2006)
- 2007 (2007)
- 2008 (2008)
- 2009 (2009)
- 2010 (2010)
- 2011 (2011)
- 2012 (2012)
- 2013 (2013)
- 2014 (2014)
- 2015 (2015)
- 2016 (2016)
- 2017 (2017)
- 2018 (2018)
- 2019 (2019)
- 2020 (2020)
- 2021 (2021)
- 2022 (2022)

D3 - Practice

Which of the following best describes the area where your practice is based?

- Major conurbation (e.g. London, Glasgow) (1)
- Large town/city (e.g. Nottingham, Cardiff) (2)
- Medium town/city (e.g. Worcester, Dundee) (3)
- Small town/city (e.g. Thetford, Omagh) (4)
- Village/hamlet (5)
- Other (6)

D3b

Please specify “other” practice location

|  | ______________________________ |
| --- | --- |

D5a - GPwER

Are you a GP with an extended role (GPwER) in any of the following areas ?

- Acute medicine (1)
- Cardiology (2)
- Dermatology (3)
- Diabetes (4)
- Mental Health (5)
- Musculoskeletal healthcare / sports injuries (6)
- Neurology (7)
- Reproductive health (8)
- Respiratory medicine (9)
- Women's health (10)
- Other (98)
- None of these (99)

The following questions ask for your experiences with using Open AI's Chat GPT (or Google's Bard or Microsoft's Bing AI if you have used those instead):

Q1

Have you ever used any of the following to assist you in any aspect of clinical practice?

Please select all that apply:

- Chat GPT (1)
- Google's Bard (2)
- Microsoft's Bing AI (3)
- Other (please specify) (4)____________
- None (5)

Q1a

What are you using the tool to assist with?

Please select all that apply

- Suggesting a differential diagnosis (1)
- Suggesting treatment options (2)
- Generating documentation after patient appointments (3)
- Patient summarization / timelines from prior documentation (4)
- Other (please specify) (5)____________

Q2

Please think about how the following tasks could be affected by Chat GPT/Bard/Bing AI.

 Indicate how strongly you agree or disagree with the statements below.

"These tools will improve…

|  | Strongly disagree (1) | Disagree (2) | Somewhat disagree (3) | Somewhat agree (4) | Agree (5) | Strongly agree (6) | Don't know (7) |
| --- | --- | --- | --- | --- | --- | --- | --- |
| patient information gathering (1) |  |  |  |  |  |  |  |
| diagnostic accuracy (2) |  |  |  |  |  |  |  |
| the creation of personalized treatment plans (3) |  |  |  |  |  |  |  |
| prognostic accuracy (4) |  |  |  |  |  |  |  |
| the delivery of empathy (5) |  |  |  |  |  |  |  |
| documentation (6) |  |  |  |  |  |  |  |

Q3

Please think about how healthcare could be affected by Chat GPT/Bard/Bing AI.

Indicate how strongly you agree or disagree with the statements below which refer to the use of these tools among clinicians and patients.

"Use of these tools will…

|  | Strongly disagree (1) | Disagree (2) | Somewhat disagree (3) | Somewhat agree (4) | Agree (5) | Strongly agree (6) | Don't know (7) |
| --- | --- | --- | --- | --- | --- | --- | --- |
| increase the risk of patient harm (1) |  |  |  |  |  |  |  |
| increase risks of inequities in care delivery (2) |  |  |  |  |  |  |  |
| mean more patients will rely on them instead of seeking medical attention (3) |  |  |  |  |  |  |  |
| mean clinicians need more support/training in understanding them (4) |  |  |  |  |  |  |  |
| Increase efficiencies in healthcare (5) |  |  |  |  |  |  |  |

Q4

Please think about how your practice could be affected by Chat GPT/Bard/Bing AI.

|  | Decrease my risk of having legal action taken against me (1) | Increase my risk of having legal action taken against me (2) | Neither decrease nor increase my risk (3) | Don't know (4) |
| --- | --- | --- | --- | --- |
| In your opinion, these tools will: (1) |  |  |  |  |

Q5

Please add any additional comments you might have about the use of Chat GPT/Bard/Bing AI in primary care.

|  |
| --- |

BAS5x99

- No additional comments (99)

D3

Please add any additional comments you might have about the use of the Chat GPT/Bard/Bing AI in medicine.

|  |
| --- |

D3ax99

- No additional comments (99)
